# Supplementary material for: Graph Curvature for Differentiating Cancer Networks
Source: PubMed Central journal article supplement (PMC4500997; doi:10.1038/srep12323), 2015-07-14
Supplement: srep12323-s1.pdf [file srep12323-s1.pdf]

## SUPPLEMENTARY INFORMATION FILE

### Graph Curvature for Differentiating Cancer Networks

Romeil Sandhu<sup>1+</sup>, Tryphon Georgiou<sup>2</sup>, Ed Reznik<sup>2</sup>, Liangjia Zhu, Ivan Kolesov<sup>1</sup>, Yasin Senbabaoglu<sup>2</sup>, and Allen Tannenbaum<sup>1+\*</sup>

<sup>1</sup> Departments of Computer Science and Applied Mathematics/Statistics, Stony Brook University, Stony Brook, NY 11794

<sup>2</sup> Department of Electrical and Computer Engineering, University of Minnesota, Minneapolis, MN 55455

<sup>3</sup> Computational Biology, Memorial Sloan Kettering, New York, NY 10065

+These authors contributed equally to this work

\*corresponding author: allen.tannenbaum@stonybrook.edu

#### SUPPLEMENTARY FIGURES:

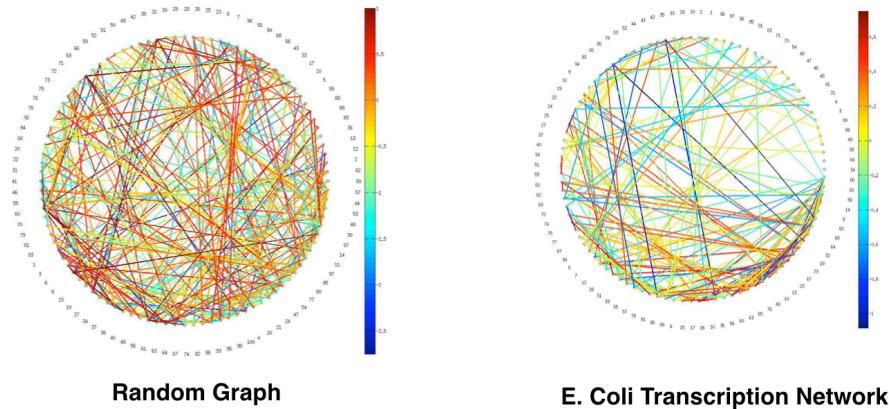

**Supp. Fig. 1:** We computed the Ollivier-Ricci curvature of a random network and of a transcription network of *E. Coli*: darker colors represent more negative curvature. The average Ollivier-Ricci curvature for the random network and *E. Coli* was  $-0.3520$  and  $-0.0222$ , respectively. This supports previous evidence regarding inherent biological robustness of such networks exhibiting motifs to that of a random network.

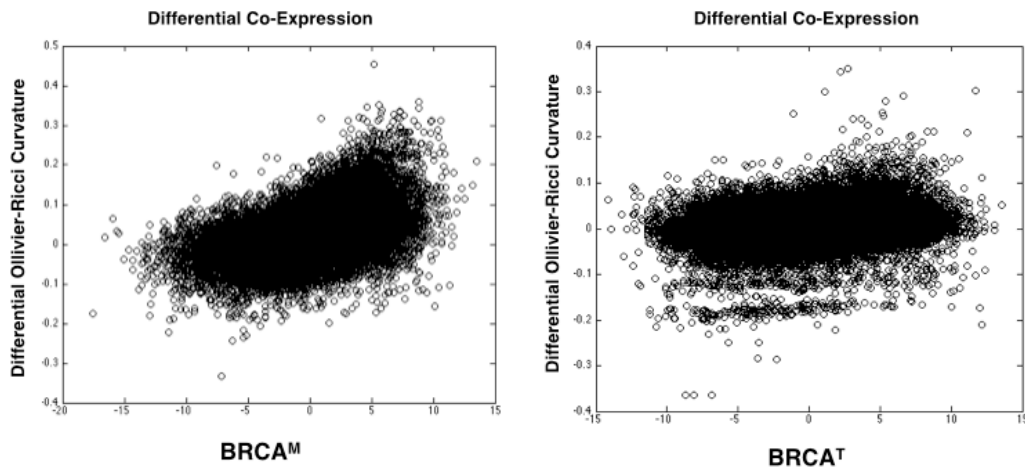

**Supp. Fig. 2:** We computed and plot the differential co-expression with that of differential Ollivier-Ricci curvature to illustrate the uncovering of new information from the underlying network. In particular, the ranking of gene-to-gene interactions are different and the above plot is presented for the case of breast cancer. Similar results hold for remaining networks studied in the present work.

SUPPLEMENTARY TABLES:

| Nodal Measure                     | BRCA <sup>T</sup> | HNSC <sup>T</sup> | LUAD <sup>T</sup> | THCA <sup>T</sup> | LIHC <sup>T</sup> | KIRP <sup>T</sup> |
|-----------------------------------|-------------------|-------------------|-------------------|-------------------|-------------------|-------------------|
| $\Delta$ Average<br>p-value       | 0.0117<br><1e-25  | 0.0039<br><1e-25  | 0.0127<br><1e-25  | 0.0059<br><1e-25  | 0.0083<br><1e-25  | 0.0095<br><1e-25  |
| $\Delta$ 5% Left Tail<br>Average  | 0.0112            | 0.0028            | 0.0077            | 0.0037            | 0.0101            | 0.0047            |
| $\Delta$ 5% Right Tail<br>Average | 0.0038            | 0.0005            | 0.0068            | 0.0023            | 0.0043            | 0.0038            |

**Supp. Table 1:** A distribution analysis for changes in Ollivier-Ricci average curvature between cancer and normal tissue for all case studies involving a subset of known cancer related genes (denoted by <sup>T</sup>). These statistics show that there exists a positive shift in the distribution signifying robustness. We also include the one tailed pair Wilcoxon signed rank test p-values to support the above statistics

| Left Tail Length (%) | BRCA <sup>M</sup> | HNSC <sup>M</sup> | KIRP <sup>M</sup> | LIHC <sup>M</sup> | LUAD <sup>M</sup> | THCA <sup>M</sup> |
|----------------------|-------------------|-------------------|-------------------|-------------------|-------------------|-------------------|
| 0.10%                | 0.0160            | 0.0117            | 0.0145            | 0.0041            | 0.0085            | 0.0025            |
| 0.50%                | 0.0111            | 0.0115            | 0.0121            | 0.0036            | 0.0052            | 0.0023            |
| 1.00%                | 0.0097            | 0.0107            | 0.0117            | 0.0034            | 0.0035            | 0.0021            |
| 3.00%                | 0.0072            | 0.0086            | 0.0095            | 0.0018            | 0.0024            | 0.0014            |

**Supp. Table 2:** This table provides the difference in expected value of varying tail lengths for all network composed of metabolic genes conducted in this paper.

| Left Tail Length (%) | BRCA <sup>T</sup> | HNSC <sup>T</sup> | LUAD <sup>T</sup> | THCA <sup>T</sup> | LIHC <sup>T</sup> | KIRP <sup>T</sup> |
|----------------------|-------------------|-------------------|-------------------|-------------------|-------------------|-------------------|
| 0.10%                | 0.0359            | 0.0186            | 0.0359            | 0.0006            | 0.0158            | 0.0198            |
| 0.50%                | 0.0185            | 0.0100            | 0.0104            | 0.0006            | 0.0122            | 0.0047            |
| 1.00%                | 0.0128            | 0.0072            | 0.0078            | 0.0036            | 0.0138            | 0.0074            |
| 3.00%                | 0.0087            | 0.0033            | 0.0056            | 0.0047            | 0.0123            | 0.0069            |

**Supp. Table 3:** This table provides the difference in expected value of varying tail lengths for networks composed of known cancer related genes conducted in this paper.

| Gene Rank | $\Delta$ Ollivier-Ricci Curvature (Cancer-Normal) | Gene X (Symbol) | Gene Y (Symbol) |
|-----------|---------------------------------------------------|-----------------|-----------------|
| 1         | 0.4642                                            | ACAA2           | MYO5B           |
| 2         | 0.4170                                            | LPO             | SOD3            |
| 3         | 0.4162                                            | BPNT1           | GLYCTK          |
| 4         | 0.4067                                            | GLYCTK          | GAL3ST1         |
| 5         | 0.4057                                            | PPAP2A          | PPAP2C          |
| 6         | 0.3916                                            | ACO1            | OAT             |
| 7         | 0.3881                                            | HADHB           | MYO5B           |
| 8         | 0.3805                                            | GUCY2D          | NPR2            |
| 9         | 0.3687                                            | GUCY2D          | NPR1            |
| 10        | 0.3624                                            | GOT2            | ACO1            |

**Supp. Table 4:** This table provides the top 10 gene interactions with respect to Ollivier- Ricci curvature for the case of BRCA<sup>M</sup>.

| Nodal Measure                | BRCA <sup>M</sup> | HNSC <sup>M</sup> | KIRP <sup>M</sup> | LIHC <sup>M</sup> | LUAD <sup>M</sup> | THCA <sup>M</sup> |
|------------------------------|-------------------|-------------------|-------------------|-------------------|-------------------|-------------------|
| $\Delta S_{\min}$<br>p-value | 0.0150<br><1e-25  | 0.0118<br>8e-16   | 0.0121<br>4e-11   | 0.0057<br>7.5e-7  | 0.0070<br>9e-8    | 0.0044<br>2e-4    |
| $\Delta S_{\max}$<br>p-value | 0.0344<br><1e-25  | 0.0366<br><1e-25  | 0.0341<br><1e-25  | 0.0102<br><1e-25  | 0.0203<br><1e-25  | 0.0109<br>7e-23   |

**Supp. Table 5:** We provide two additional nodal measures for which we attach the minimum (and maximum) Ollivier Ricci Curvature at node x in an adjacent neighborhood of y for the network composed of metabolic genes. Similar to that of nodal measures discussed in the present work, we take the average over nodal measures. One can see that all networks exhibit, on average, higher nodal robustness with respect to these measures as well. We also provide p-values for one-tailed paired Wilcoxon signed rank test.

| Nodal Measure                 | BRCA <sup>T</sup> | HNSC <sup>T</sup> | LUAD <sup>T</sup> | THCA <sup>T</sup> | LIHC <sup>T</sup> | KIRP <sup>T</sup> |
|-------------------------------|-------------------|-------------------|-------------------|-------------------|-------------------|-------------------|
| $\Delta S$<br>p-value         | 0.0024<br>2.5e-5  | 0.0015<br>4e-1    | 0.0048<br>2e-8    | 0.0048<br>1e-6    | 0.0056<br>5e-15   | 0.0035<br>7e-3    |
| $\Delta \hat{S}$<br>p-value   | 0.4292<br>2e-16   | 0.1423<br>2e-5    | 0.4638<br>5e-20   | 0.2177<br>5e-11   | 0.3025<br>7e-23   | 0.3471<br>4e-13   |
| $\Delta S_{\min}$<br>p-value  | 0.0157<br>3e-3    | 0.0121<br>7e-7    | 0.0116<br>7e-6    | 0.0030<br>3e-2    | 0.0076<br>2e-5    | 0.0086<br>5e-5    |
| $\Delta S_{\max}$<br>p-value  | 0.0123<br>9e-6    | 0.0143<br>1e-7    | 0.0121<br>4e-11   | 0.0052<br>7e-4    | 0.0105<br>1e-7    | 0.0124<br>2e-8    |
| $\Delta S_e$<br>p-value       | 0.0117<br><1e-25  | 0.0079<br><1e-25  | 0.0079<br><1e-25  | 0.0037<br><1e-25  | 0.0042<br><1e-25  | 0.0075<br><1e-25  |
| $\Delta \hat{S}_e$<br>p-value | 0.0303<br><1e-25  | 0.0213<br><1e-25  | 0.0221<br><1e-25  | 0.0102<br><1e-25  | 0.01116<br><1e-25 | 0.0202<br><1e-25  |

**Supp. Table 6:** We provide nodal measures for networks involving a subset of known cancer related genes (denoted by <sup>T</sup>) along with the one tailed paired Wilcoxon signed rank test.

| Gene Rank | $\Delta$ Scalar Curvature<br>(Cancer-Normal) | Differential<br>Co-expression | Gene<br>(Symbol) |
|-----------|----------------------------------------------|-------------------------------|------------------|
| 1         | 0.1477                                       | 1.8524                        | RSPO2            |
| 2         | 0.1415                                       | 2.3779                        | RSPO3            |
| 3         | 0.0931                                       | 227.8612                      | PICALM           |
| 4         | 0.0910                                       | 91.1372                       | SDHB             |
| 5         | 0.0707                                       | 57.1017                       | KIT              |
| 6         | 0.0646                                       | 35.9899                       | CEBPA            |
| 7         | 0.0645                                       | 2.6437                        | PDRM1            |
| 8         | 0.0582                                       | 142.9690                      | CLTCL1           |
| 9         | 0.0561                                       | 44.3039                       | TAL1             |
| 10        | 0.0554                                       | 116.3448                      | CLTC             |

**Supp. Table 7:** This table provides the top 10 genes with respect to scalar curvature for the case of BRCA<sup>T</sup>.
